# Supplementary material for: The association between proton pump inhibitor use and the risk of mortality in patients with kidney disease: a systematic review and meta-analysis
Source: Research Square preprint supplement (doi:10.21203/rs.3.rs-7206711/v1), 2025-08-19
Supplement: Supplementary file 1 [file 2c7b392d2fc461953e762faa.docx]

Supplement Table 1. Search Strategy for literature search

Ovid-MEDLINE

| 1 | Kidney Diseases/ |
| --- | --- |
| 2 | exp Renal Replacement Therapy/ |
| 3 | Renal Insufficiency/ |
| 4 | exp Renal Insufficiency, Chronic/ |
| 5 | Diabetic Nephropathies/ |
| 6 | exp Hypertension, Renal/ |
| 7 | (kidney disease* or renal disease* or kidney failure or renal failure or nephropath* or hemodialysis or haemodialysis or hemofiltration or haemofiltration or hemodiafiltration or haemodiafiltration or predialysis or pre-dialysis).tw. |
| 8 | (ESRF or ESKF or ESRD or ESKD or CKF or CKD or CRF or CRD or CAPD or CCPD or APD).tw. |
| 9 | Uremia/ |
| 10 | (uremic or ur?emia).tw. |
| 11 | or/1-10 |
| 12 | proton pump inhibitor.mp. or exp Proton Pump Inhibitors/ |
| 13 | PPI*.tw. |
| 14 | exp ESOMEPRAZOLE/ |
| 15 | exp OMEPRAZOLE/ |
| 16 | exp Pantoprazole/ |
| 17 | exp RABEPRAZOLE/ |
| 18 | exp DEXLANSOPRAZOLE/ |
| 19 | exp LANSOPRAZOLE/ |
| 20 | (Esomeprazole* or Omeprazole* or Pantoprazole* or Rabeprazole* or Dexlansoprazole* or Lansoprazole* or Tenatoprazole* or Benatoprazole*).tw. |
| 21 | or/12-20 |
| 22 | 11 and 21 |
| 23 | (11 and 27) limit English language and humans |

Ovid-EMBASE

| 1 | renal replacement therapy/ |
| --- | --- |
| 2 | kidney disease/ |
| 3 | kidney failure/ |
| 4 | chronic kidney disease/ |
| 5 | chronic kidney failure/ |
| 6 | mild renal impairment/ |
| 7 | subclinical renal impairment/ |
| 8 | moderate renal impairment/ |
| 9 | severe renal impairment/ |
| 10 | end stage renal disease/ |
| 11 | renal replacement therapy-dependent renal disease/ |
| 12 | diabetic nephropathy/ |
| 13 | kidney transplantation/ |
| 14 | renovascular hypertension/ |
| 15 | (hemodialysis or haemodialysis or hemofiltration or haemofiltration or hemodiafiltration of haemodiafiltration or dialysis or predialysis or pre-dialysis).tw. |
| 16 | (CAPD or CCPD or APD or CKF or CKD or CRF or CRD or ESRF or ESKF or ESRD or ESKD).tw. |
| 17 | ((kidney or renal) adj (transplant* or graft* or allograft*)).tw. |
| 18 | or/1-17 |
| 19 | proton pump inhibitor.mp. or exp Proton Pump Inhibitors/ |
| 20 | PPI*.tw. |
| 21 | exp ESOMEPRAZOLE/ |
| 22 | exp OMEPRAZOLE/ |
| 23 | exp Pantoprazole/ |
| 24 | exp RABEPRAZOLE/ |
| 25 | exp DEXLANSOPRAZOLE/ |
| 26 | exp LANSOPRAZOLE/ |
| 27 | (Esomeprazole* or Omeprazole* or Pantoprazole* or Rabeprazole* or Dexlansoprazole* or Lansoprazole* or Tenatoprazole* or Benatoprazole*).tw. |
| 28 | or/19-27 |
| 29 | 18 and 28 |
| 30 | limit 29 to English language and humans and (article or article in press) |

Cochrane CENTRAL

| #1 | MeSH descriptor: [Kidney Diseases] explode all trees |
| --- | --- |
| #2 | MeSH descriptor: [Renal Replacement Therapy] explode all trees |
| #3 | MeSH descriptor: [Renal Insufficiency] explode all trees |
| #4 | MeSH descriptor: [Diabetic Nephropathies] explode all trees |
| #5 | MeSH descriptor: [Hypertension, Renal] explode all trees |
| #6 | ((kidney disease*) or (renal disease*) or (kidney failure) or (renal failure) or nephropath* or hemodialysis or haemodialysis or hemofiltration or haemofiltration or hemodiafiltration or haemodiafiltration or predialysis or pre-dialysis):ti,ab,kw |
| #7 | (ESRF or ESKF or ESRD or ESKD or CKF or CKD or CRF or CRD or CAPD or CCPD or APD):ti,ab,kw |
| #8 | MeSH descriptor: [Uremia] explode all trees |
| #9 | (uremic or uraemia or uremia):ti,ab,kw |
| #10 | #1 or #2 or #3 or #4 or #5 or #6 or #7 or #8 or #9 |
| #11 | MeSH descriptor: [Proton Pump Inhibitors] explode all trees |
| #12 | ((proton pump inhibitor*) or PPI or PPIs):ti,ab,kw |
| #13 | MeSH descriptor: [Esomeprazole] explode all trees |
| #14 | MeSH descriptor: [Omeprazole] explode all trees |
| #15 | MeSH descriptor: [Pantoprazole] explode all trees |
| #16 | MeSH descriptor: [Rabeprazole] explode all trees |
| #17 | MeSH descriptor: [Dexlansoprazole] explode all trees |
| #18 | MeSH descriptor: [Lansoprazole] explode all trees |
| #19 | (Esomeprazole* or Omeprazole* or Pantoprazole* or Rabeprazole* or Dexlansoprazole* or Lansoprazole* or Tenatoprazole* or Benatoprazole*):ti,ab,kw |
| #20 | #11 or #12 or #13 or #14 or #15 or #16 or #17 or #18 or #19 |
| #21 | #10 and #20 |
| #22 | #10 and #20 in trial |
